# Supplementary material for: Structure–Performance Correlation Inspired Platinum-Assisted Anode with a Homogeneous Ionomer Layer for Proton Exchange Membrane Water Electrolysis
Source: MDPI journal article supplement (doi:10.3390/polym16020237), 2024-01-15
Supplement: s1 [file s1]

## Supporting information for

# Structure–Performance Correlation Inspired Platinum-Assisted Anode with a Homogeneous Ionomer Layer for Proton Exchange Membrane Water Electrolysis

Feng Cheng 1,2,†, Tian Tian 1,3,†, Rui Wang 1,3,\*, Hao Zhang 3, Liyan Zhu 3 and Haolin Tang 1,3,\*

1 National Energy Key Laboratory for New Hydrogen-Ammonia Energy Technologies, Foshan Xianhu Laboratory, Foshan 528200, China; cf1987416@163.com (F.C.); ttcx@whut.edu.cn (T.T.)

2 Wuhan Institute of Hydrogen and Fuel Cell Industrial Technology, 555 Cultural Avenue, Hongshan District, Wuhan 430070, China

3 State Key Laboratory of Advanced Technology for Materials Synthesis and Processing, Wuhan University of Technology, Wuhan 430070, China; zhanghaoxs2023@163.com (H.Z.); z1028@whut.edu.cn (L.Z.)

\* Correspondence: rwang@whut.edu.cn (R.W.), thln@whut.edu.cn (H.T.)

† These authors contributed equally to this work.

The single cell set-up was conducted as follow: The gas diffusion layer on the anode side uses platinum-coated titanium felt and titanium mesh to form a gradient diffusion structure. The current collecting plate uses a three-snake platinum-coated titanium plate. The gas diffusion layer on the cathode side is made of carbon paper (Freudenberg, E20H), and the current collecting plate is made of three-snake graphite plate. The bolt assembly pressure is 6 ~ 8 N\*m. After assembly, the air tightness test is carried out. After passing the test, it is installed on the test bench for testing.

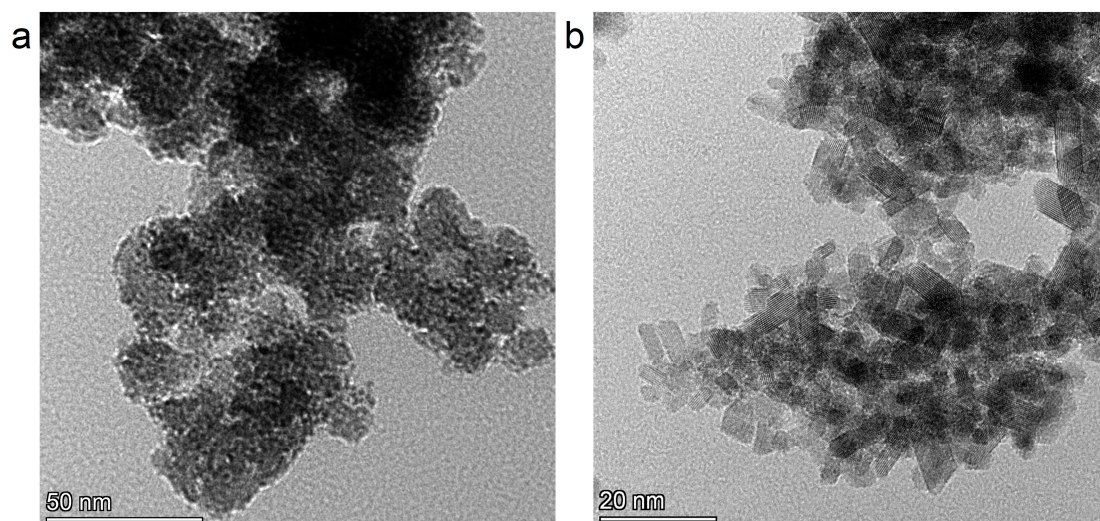

Figure s1. Low-resolution TEM images of the a)  $\text{IrO}_x \cdot n\text{H}_2\text{O}$  and b)  $\text{IrO}_2$  catalysts.

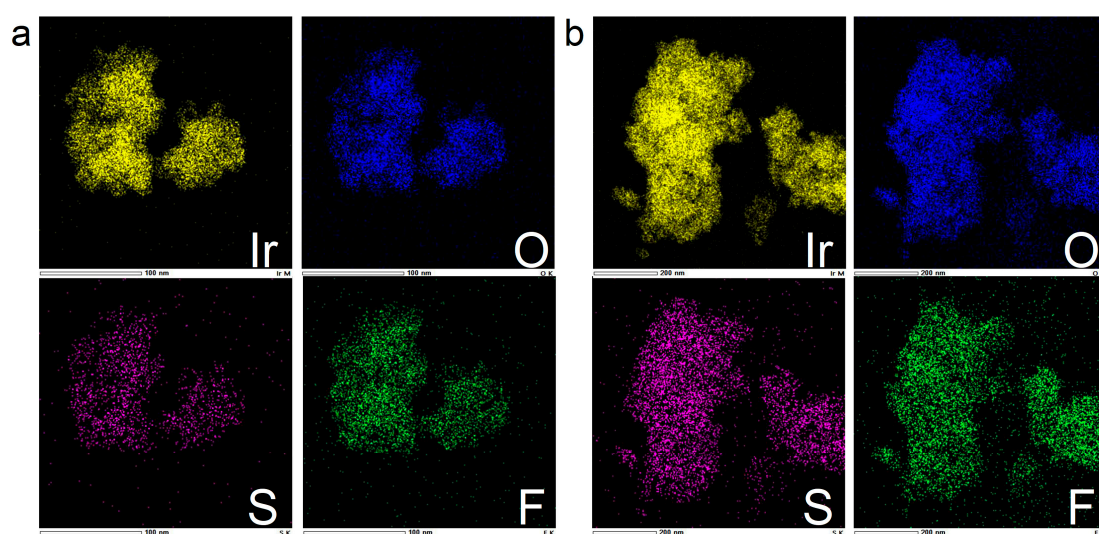

Figure s2. Elemental mapping images of element Ir, S, O, and F of a)  $\text{IrO}_x \cdot n\text{H}_2\text{O}$  and b)  $\text{IrO}_2$ .

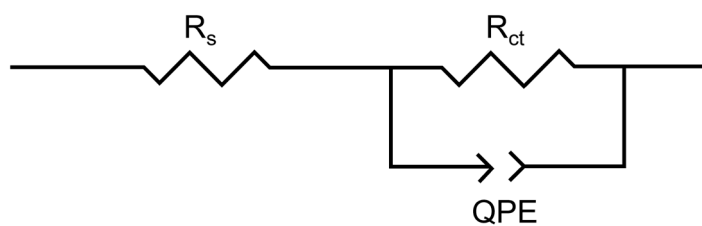

Figure s3. The equivalent circuit for the catalysts.

Table s1. Fitting results of the equivalent circuit for the catalysts

| Catalyst       | $\text{IrO}_x \cdot n\text{H}_2\text{O}$ | $\text{IrO}_2$ |
|----------------|------------------------------------------|----------------|
| $R_s$ (ohm)    | 12.47                                    | 12.27          |
| $R_{ct}$ (ohm) | 16.19                                    | 17.59          |

Table s2. The ratio of Ir (0), Ir ( $3^+$ ), and Ir ( $4^+$ ), for  $\text{IrO}_x \cdot n\text{H}_2\text{O}$  and  $\text{IrO}_2$

| Valence      | $\text{IrO}_x \cdot n\text{H}_2\text{O}$ | $\text{IrO}_2$ |
|--------------|------------------------------------------|----------------|
| Ir (0)       | /                                        | 18.2%          |
| Ir ( $3^+$ ) | 40%                                      | 25.4%          |
| Ir ( $4^+$ ) | 60%                                      | 56.4%          |
